# Supplementary material
Source: PubMed Central journal article supplement (PMC3025174)

Supplementary figure 1

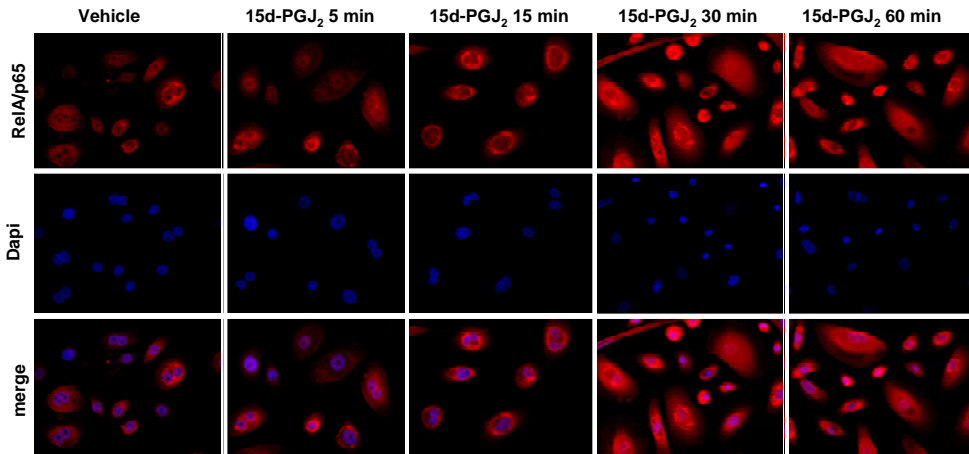

Supplement: NIHMS263432-supplement-Supplement_1.pdf [file NIHMS263432-supplement-Supplement_1.pdf]
